# Supplementary material
Source: PubMed Central journal article supplement (PMC3857547)

Supplemental figure 4

A tentative model describing DEN-induced cyst and HCC development in miR-122 deficient liver

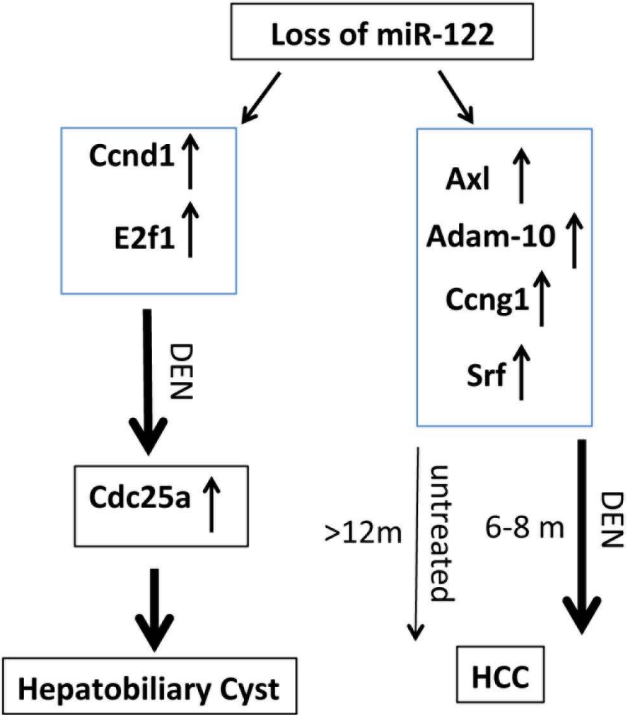

Supplement: mmc4.pdf [file mmc4.pdf]
