# Supplementary material
Source: PubMed Central journal article supplement (PMC3857547)

**A**

**Untreated Control vs. LKO**

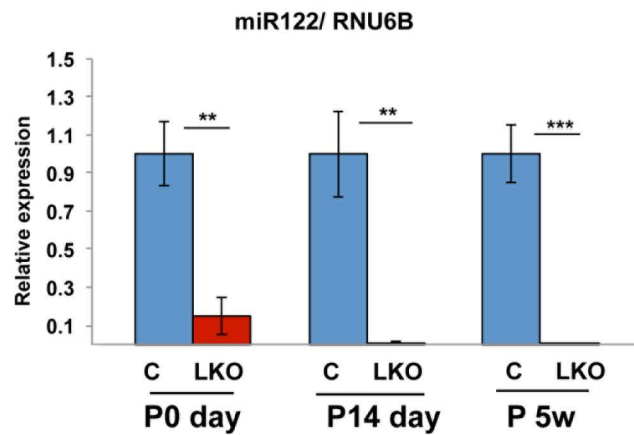

**B**

**25w DEN Control vs. LKO**

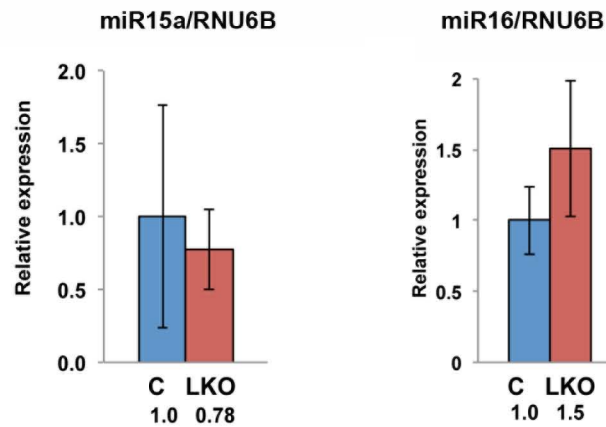

**C**

**25w DEN Control vs. LKO**

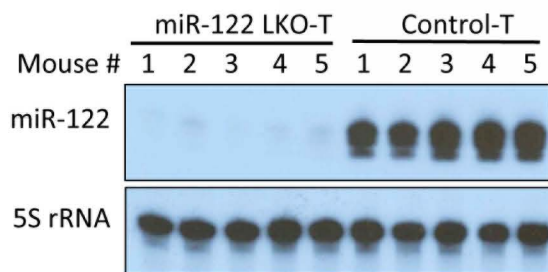

**D**

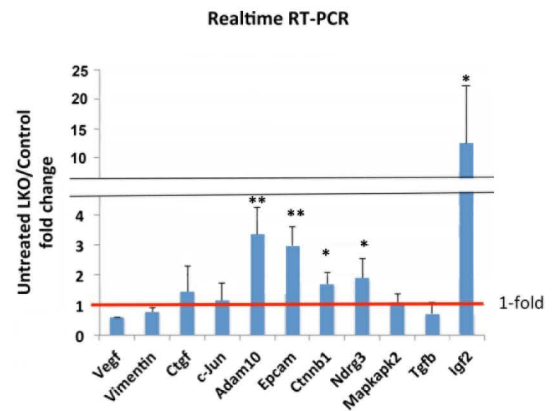

Supplement: mmc1.pdf [file mmc1.pdf]

Supplemental Figure 2

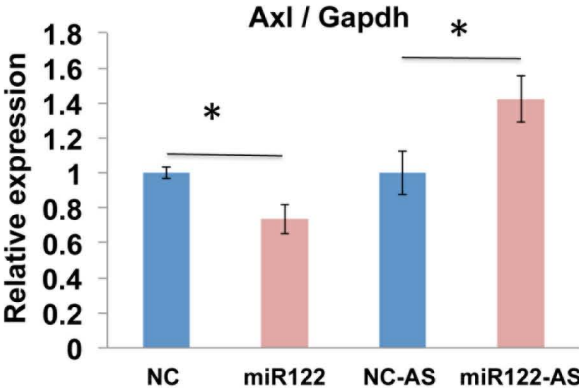

Supplement: mmc2.pdf [file mmc2.pdf]

## Supplemental figure 3

### DHE staining

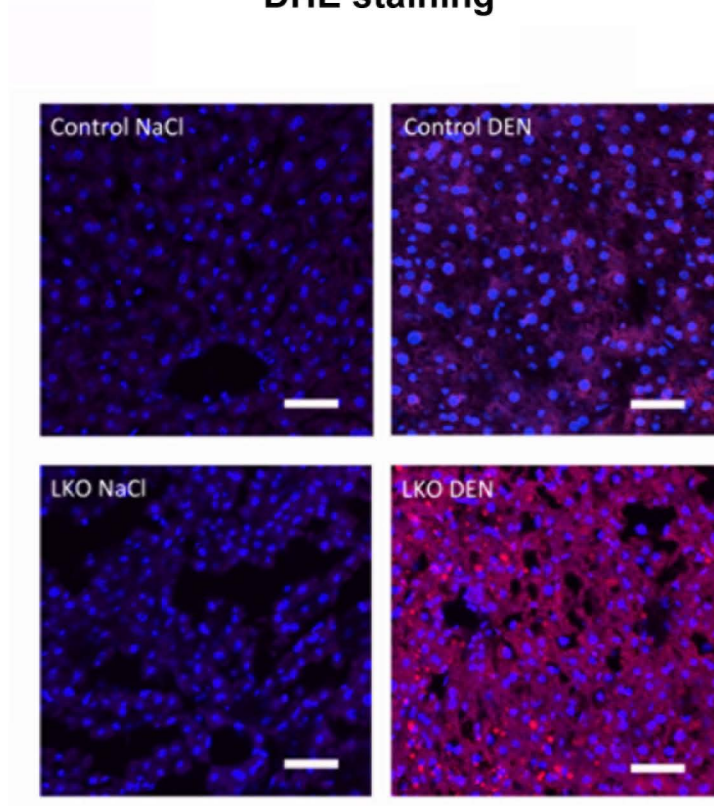

Supplement: mmc3.pdf [file mmc3.pdf]
